# Supplementary material
Source: MDPI journal article supplement (https://www.mdpi.com/2076-3417/9/20/4213)
Supplement: s1 [file s1 › applsci-588977-SI.pdf]

# Supplementary Material

## Removal of Different Kinds of Heavy Metals by Novel PPG-nZVI Beads and Their Application in Simulated Stormwater Infiltration Facility

Xiaoran Zhang<sup>1,2,3</sup>, Lei Yan<sup>1</sup>, Junfeng Liu<sup>4,\*</sup>, Ziyang Zhang<sup>1,2,3</sup> and Chaohong Tan<sup>1</sup>

<sup>1</sup> Key Laboratory of Urban Stormwater System and Water Environment, Ministry of Education, Beijing University of Civil Engineering and Architecture, Beijing 102616, China; zhangxiaoran@bucea.edu.cn (X.Z.); yanlei\_1992yl@163.com (L.Y.); zhangziyang@bucea.edu.cn (Z.Z.); chaohongtan@126.com (C.T.)

<sup>2</sup> Beijing Engineering Research Center of Sustainable Urban Sewage System Construction and Risk Control, Beijing University of Civil Engineering and Architecture, Beijing 100044, China

<sup>3</sup> Beijing Advanced Innovation Center for Future Urban Design, Beijing 100044, China

<sup>4</sup> Department of Water Conservancy and Civil Engineering, Beijing Vocational College of Agriculture, Beijing 102442, China

\* Correspondence: liujunfeng@bvca.edu.cn

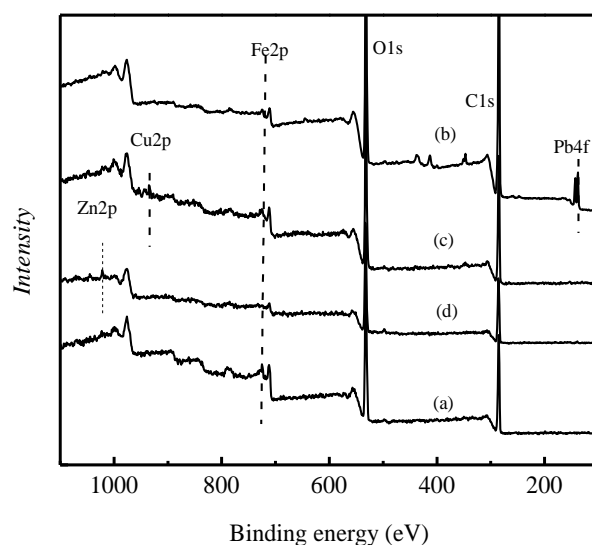

**Figure S1.** Typical wide scan XPS spectra for fresh PPG-nZVI beads (a) and for PPG-nZVI beads reaction with  $\text{Pb}^{2+}$  (b),  $\text{Cu}^{2+}$  (c) and  $\text{Zn}^{2+}$  (d).

XPS technique was used to research the element binding energy, which could be discriminate different chemical environments for a certain element. As shown in Figure S1, the observed new peak of  $\text{Pb}^{2+}$ ,  $\text{Cu}^{2+}$ ,  $\text{Zn}^{2+}$  are located at about 933 eV, 1021 eV and 138 eV, respectively, which were attributed to the photoelectron peak of different heavy metal and indicated PPG-nZVI beads reacted with  $\text{Pb}^{2+}$ ,  $\text{Cu}^{2+}$  or  $\text{Zn}^{2+}$  [1].

### References:

1. Zhang, X.; Lin, S.; Chen, Z.; Megharaj, M.; Naidu, R. Kaolinite-supported nanoscale zero-valent iron for removal of  $\text{Pb}^{2+}$  from aqueous solution: reactivity, characterization and mechanism. *Water Res* **2011**, *45*, 3481-3488, doi:10.1016/j.watres.2011.04.010.
